# Supplementary material for: Oil extraction by aminoparticle-based H2O2 activation via wet microalgae harvesting
Source: Royal Society of Chemistry journal article supplement (doi:10.1039/c3ra23266b), 2013-01-01
Supplement: c3ra23266b.pdf [file c3ra23266b.pdf]

## Supplementary Information

### Oil extraction by aminoparticles-based H<sub>2</sub>O<sub>2</sub> activation via wet microalgae harvesting

Young-Chul Lee,<sup>a</sup> Yun Suk Huh,<sup>a</sup> Wasif Farooq,<sup>b</sup> Jong-In Han,<sup>c</sup> You-Kwan Oh<sup>d</sup> and Ji-Yeon Park<sup>\*d</sup>

<sup>a</sup> Department of Biological Engineering, College of Engineering, Inha University, Incheon 402-751, Republic of Korea

<sup>b</sup> Advanced Biomass R & D Center, KAIST, 291 Daehakno, Yuseong-gu, Daejeon 305-701, Republic of Korea

<sup>c</sup> Department of Civil and Environmental Engineering, KAIST, 291 Daehakno, Yuseong-gu, Daejeon 305-701, Republic of Korea

<sup>d</sup> Clean Fuel Department, Korea Institute of Energy Research, 152 Gajeong-ro, Yuseong-gu, Daejeon 305-343, Republic of Korea

\*Corresponding author: Dr. Ji-Yeon Park, Tel.:+82-42-860-3041; Fax:+82-42-860-3495.

Email address: yearn@kier.re.kr (J.-Y. Park)

1  
2  
3  
4  
5  
6  
7  
8  
9  
10  
11  
12  
13  
14  
15  
16  
17  
18  
19  
20  
21  
22  
23  
24  
25  
26  
27

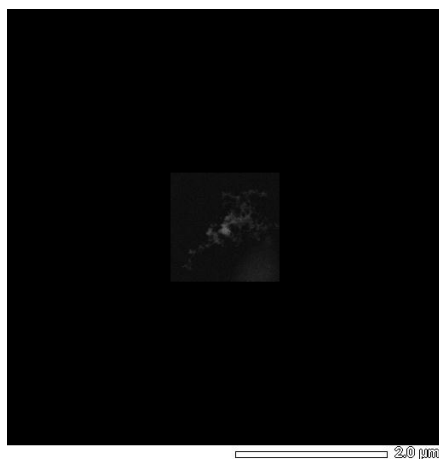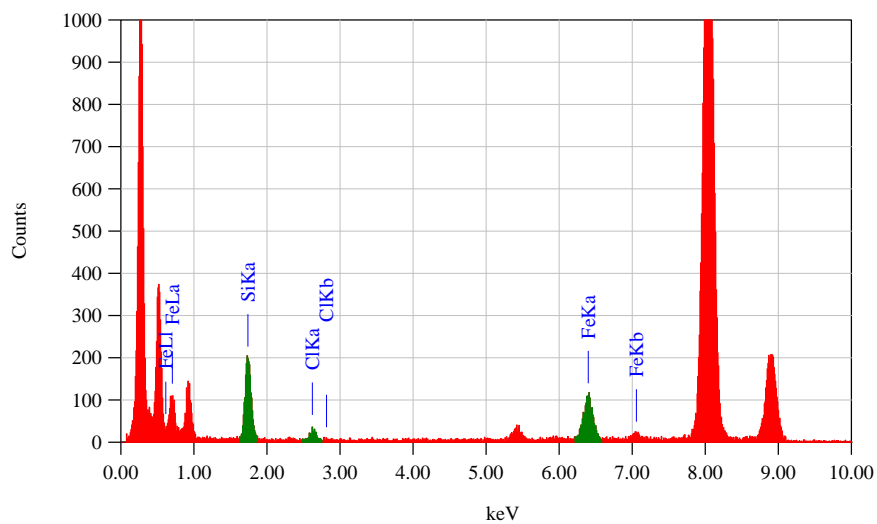

**Figure S1.** Energy-dispersive X-ray (EDX) microanalysis of Fe-aminoparticle which is adapted from the reference.<sup>36</sup>

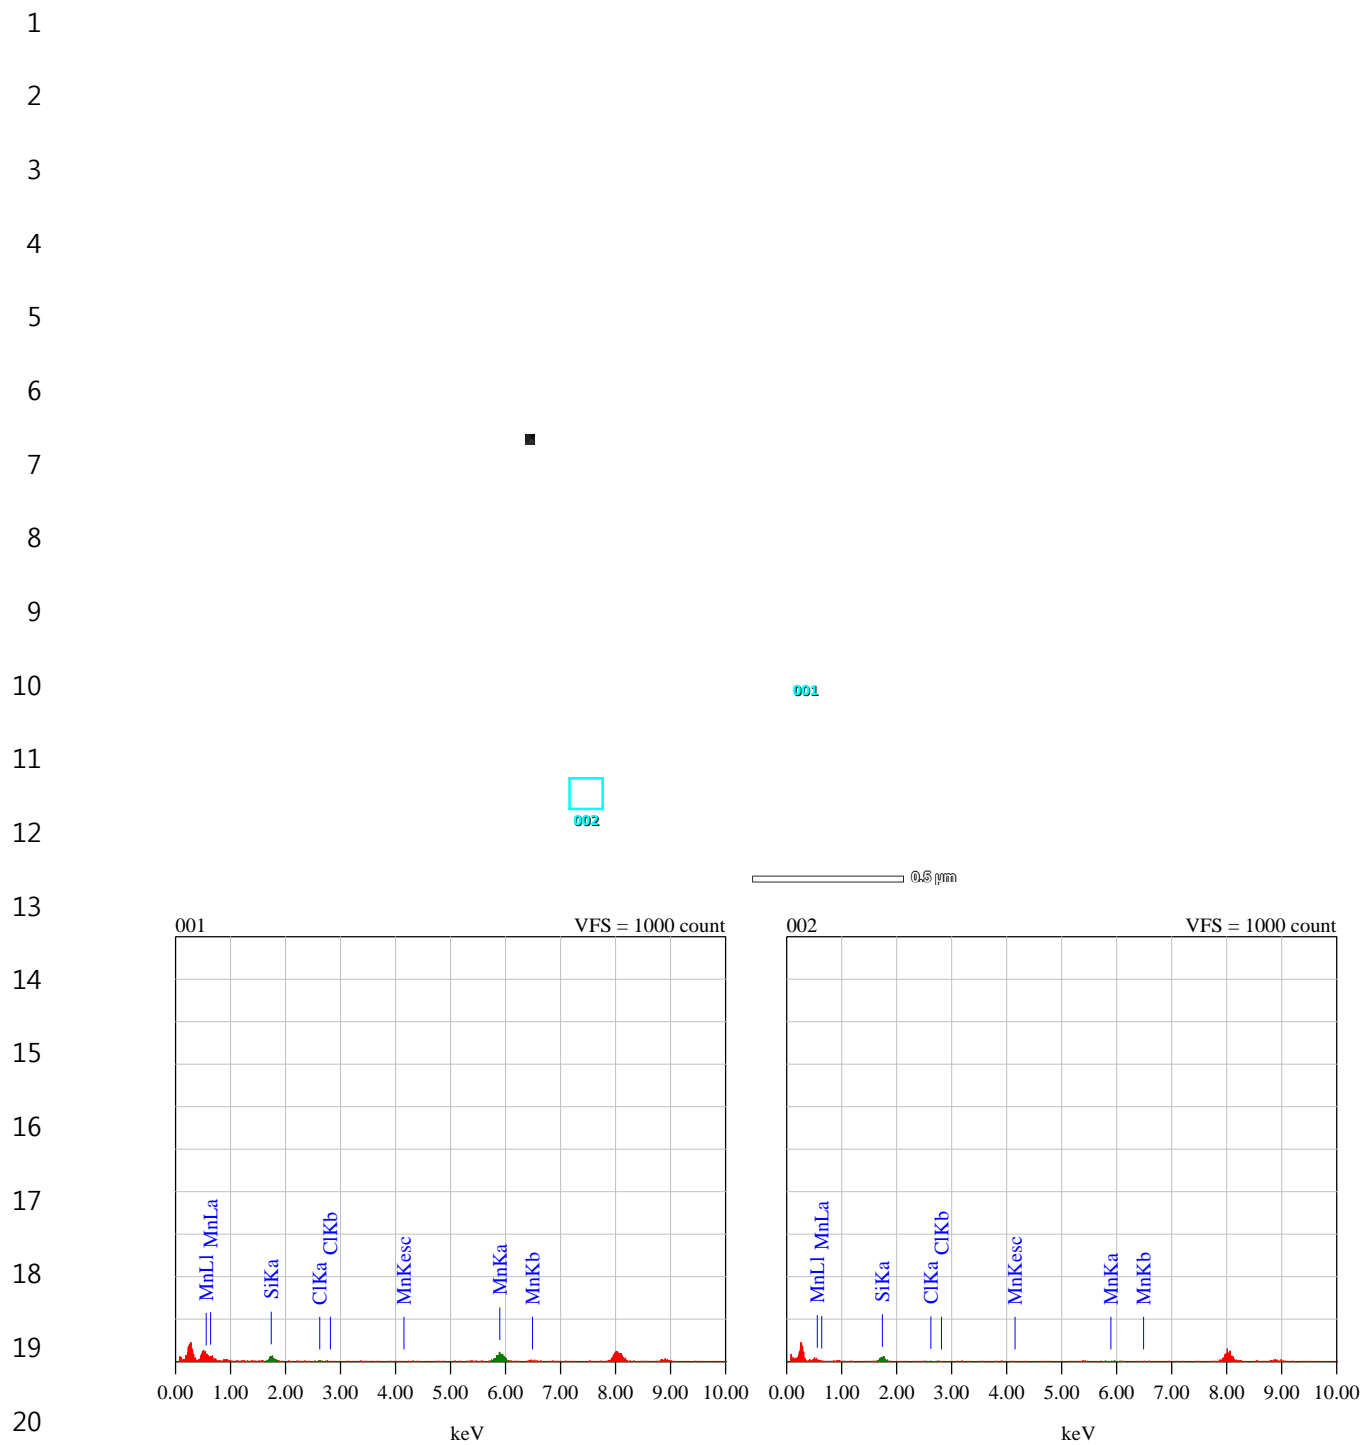

**Figure S2.** Energy-dispersive X-ray (EDX) microanalysis of Mn-aminoparticle.

1  
2  
3  
4  
5  
6  
7  
8  
9  
10  
11  
12  
13  
14  
15  
16  
17  
18  
19  
20  
21  
22  
23  
24

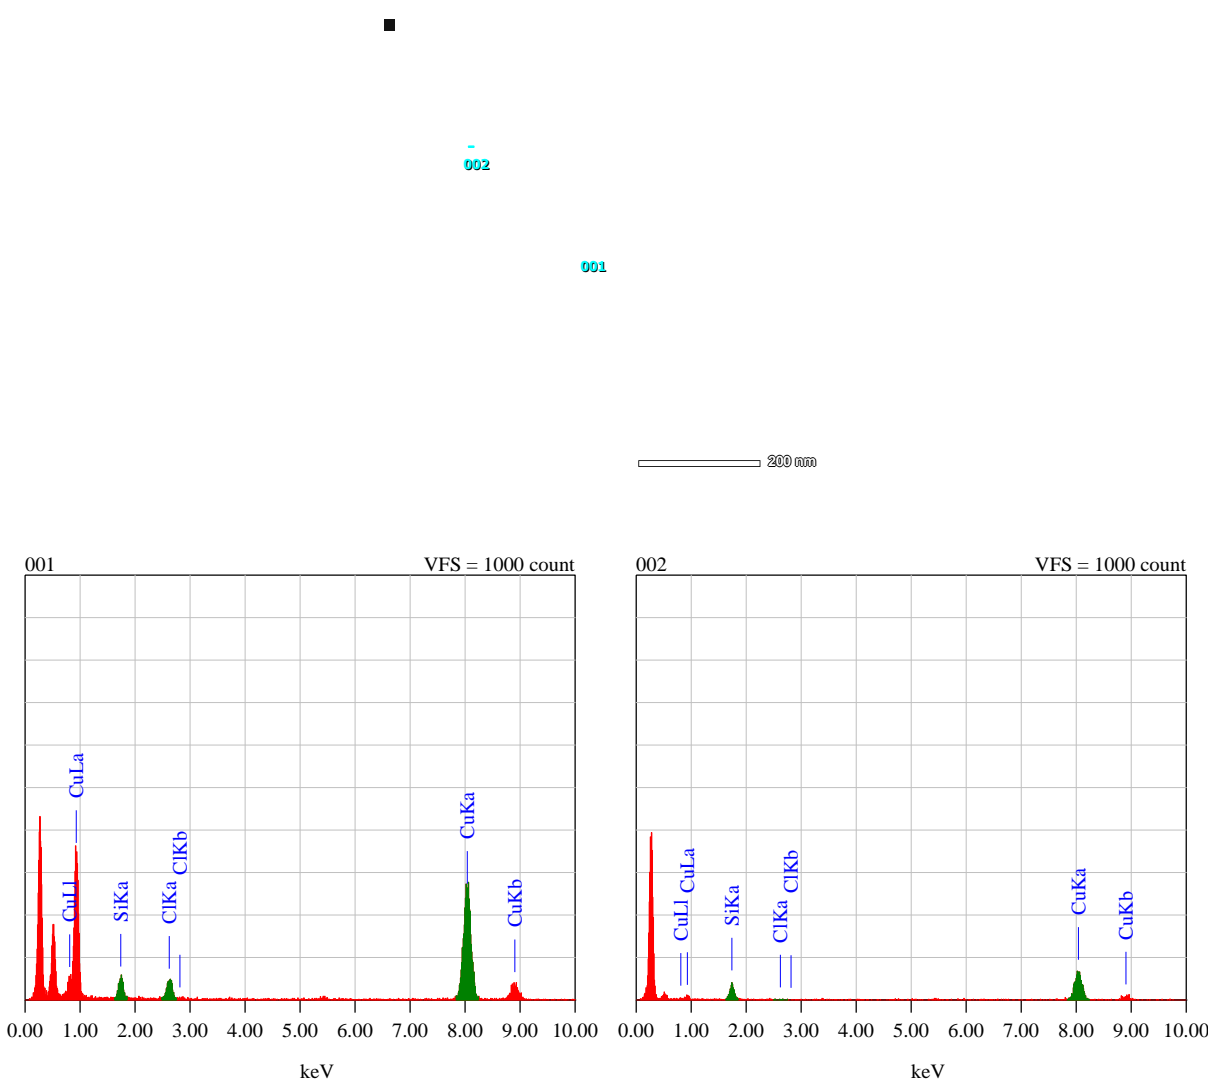

**Figure S3.** Energy-dispersive X-ray (EDX) microanalysis of Cu-aminoparticle.

1  
2  
3  
4  
5  
6  
7  
8  
9  
10  
11  
12  
13  
14  
15  
16  
17  
18  
19  
20  
21  
22  
23  
24

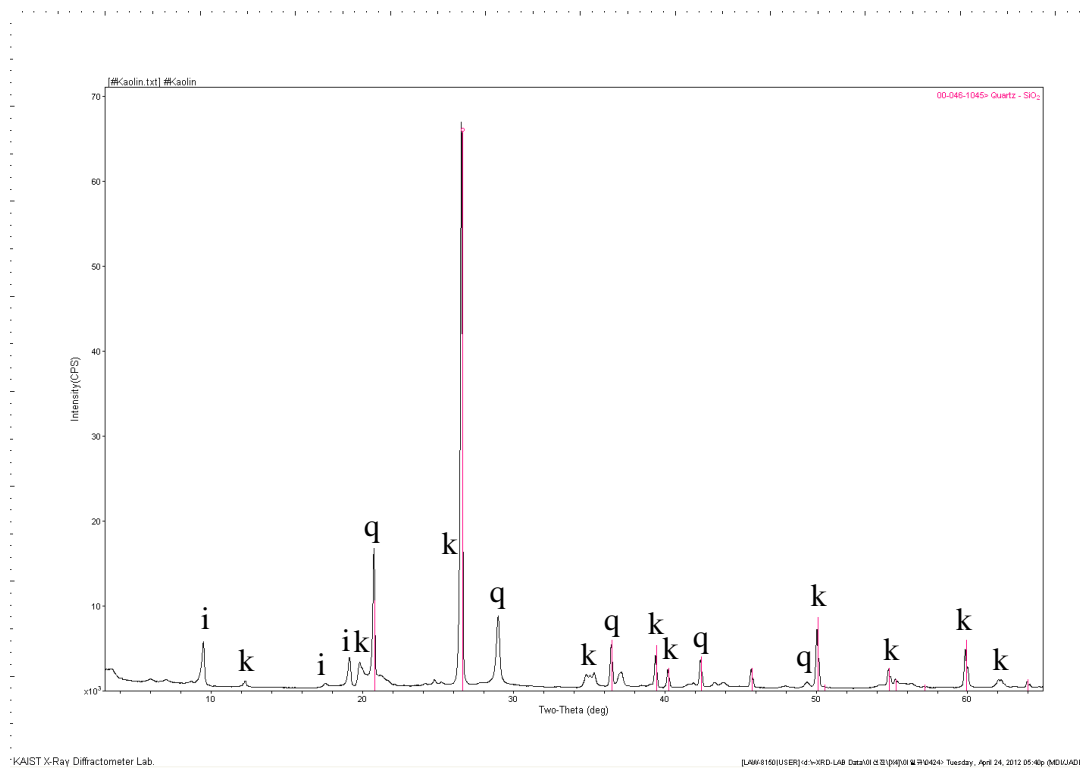

**Figure S4.** XRD pattern of kaolin (k: kaolinite, q: quartz, i: illite).

1  
2  
3  
4  
5  
6  
7  
8  
9  
10  
11  
12  
13  
14  
15  
16  
17  
18  
19  
20  
21  
22  
23  
24

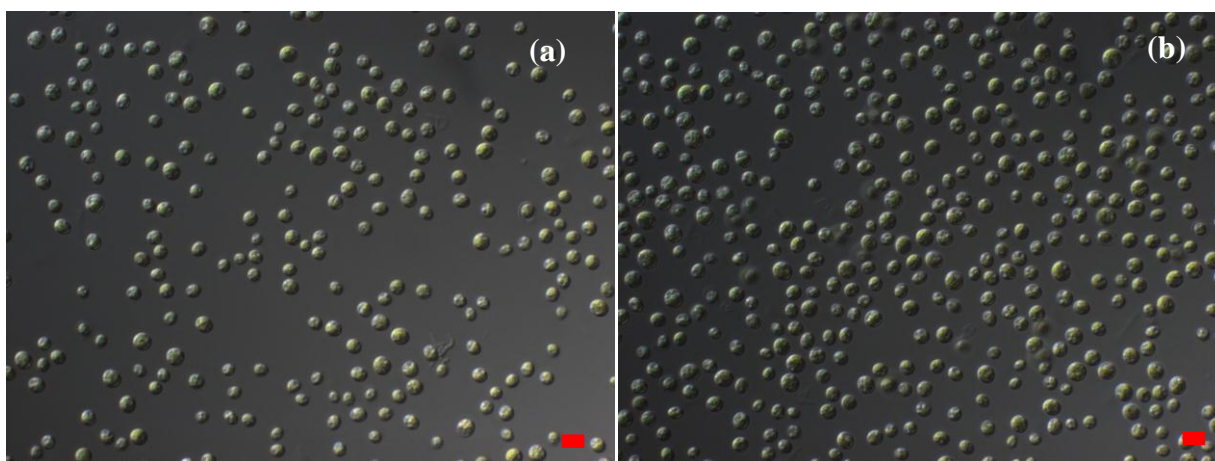

**Figure S5.** Optical microscopy images (a, b) of *Chlorella* sp. used in this study. Scale bars = 5  $\mu\text{m}$ .

1  
2  
3  
4  
5  
6  
7  
8  
9  
10  
11  
12  
13  
14  
15  
16  
17  
18  
19  
20  
21  
22

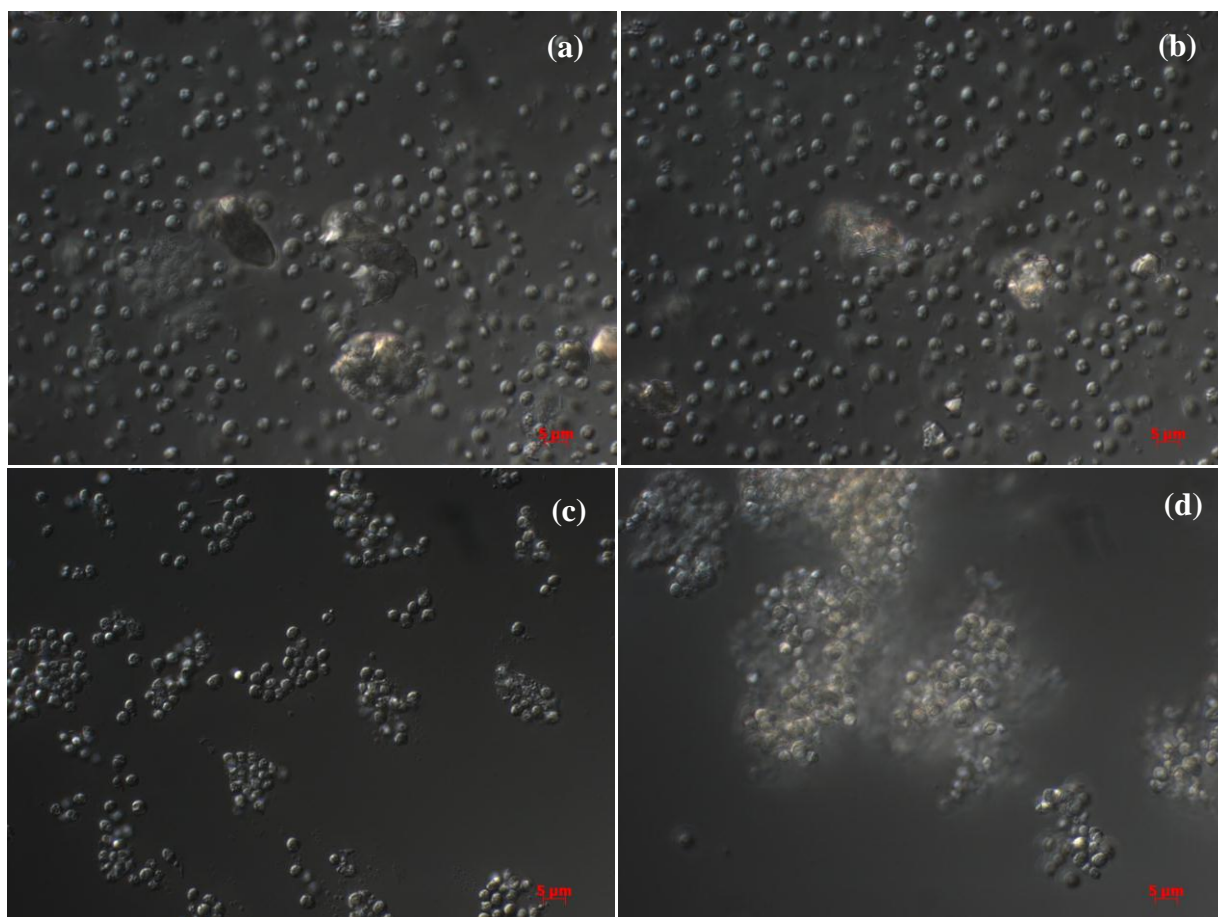

23 **Figure S6.** Optical microscopy images of *Chlorella* sp. after kaolin (a,b) and  $\text{FeCl}_3 \cdot 6\text{H}_2\text{O}$   
24 (c,d) treated with 1%  $\text{H}_2\text{O}_2$ .

1  
2  
3  
4  
5  
6  
7  
8  
9  
10  
11  
12  
13  
14  
15  
16  
17  
18  
19  
20  
21  
22  
23  
24

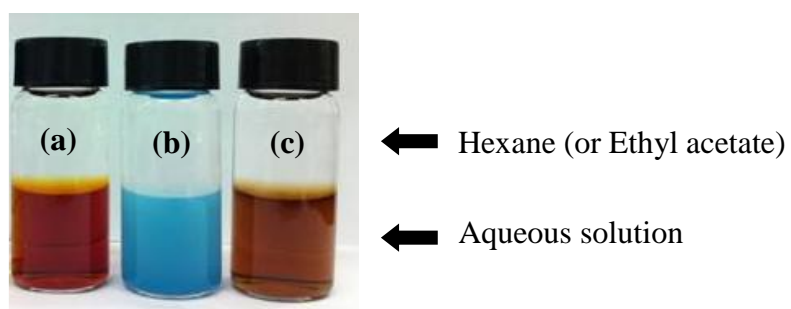

**Figure S7.** Photographs of a partitioning behavior for Fe-aminoparticle (a), Cu-aminoparticle (b), and Mn-aminoparticle (c) at 2 mg/mL in hydrophobic (10 mL) and hydrophilic (10 mL) phases.



1  
2  
3  
4  
5  
6  
7  
8  
9  
10  
11  
12  
13  
14  
15  
16  
17  
18  
19  
20  
21

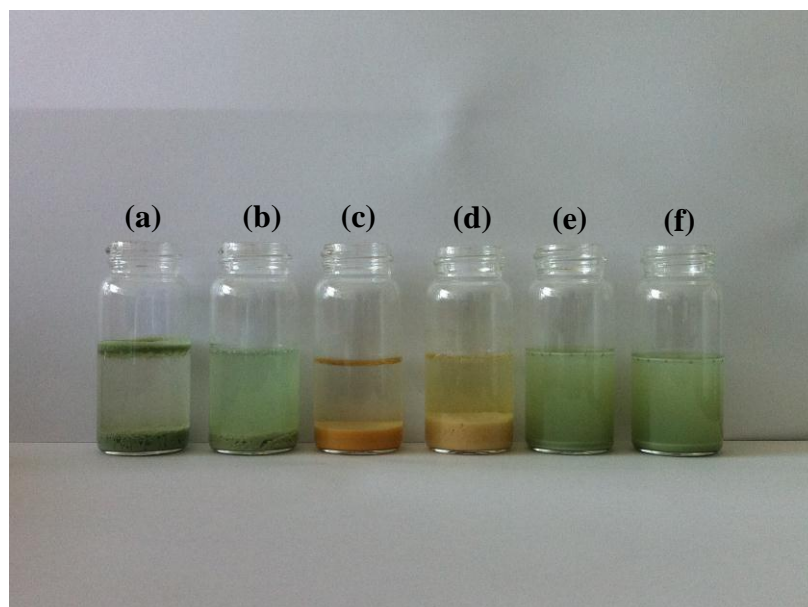

22 **Figure S8.** Photographs of *Chlorella* sp. after treatment with Mn-aminoparticle (a), Cu-  
23 aminoparticle (b), Fe-aminoparticle (c), FeCl<sub>3</sub> (d), kaolin (e), and no particle (f) in the  
24 presence of 1% H<sub>2</sub>O<sub>2</sub>.

1

2

3

4

5

6

7
